# Supplementary material
Source: publisher figshare collection journal article supplement (https://rs.figshare.com/ndownloader/files/20105294)
Supplement: Supplementary file 1 [file 20105294]

## Sheet: Reciprocity test
focal	partner	treat	last	sevexp	total
H5	F1	cccd	d	sev	2
F4	D4	cccd	d	sev	6
I1	A3	cccd	d	sev	2
G5	K2	cccd	d	sev	3
I4	J1	cccd	d	sev	4
E2	B5	cccd	d	sev	2
I5	J3	cccd	d	sev	0
C3	L1	cccd	d	sev	1
F2	L3	cccd	d	sev	4
A5	H1	cccd	d	sev	3
D3	B2	cccd	d	sev	5
K5	H1	cccd	d	sev	3
B3	F1	cccd	d	sev	1
E4	L3	cccd	d	sev	3
K1	B5	cccd	d	sev	5
D1	K2	cccd	d	sev	1
H3	D4	cccd	d	sev	6
C4	J1	cccd	d	sev	0
E5	J3	cccd	d	sev	2
A1	L1	cccd	d	sev	4
H2	B2	cccd	d	sev	2
H5	E3	dddc	c	sev	5
F4	K3	dddc	c	sev	5
I1	G1	dddc	c	sev	3
G5	D5	dddc	c	sev	4
I4	B4	dddc	c	sev	2
E2	I3	dddc	c	sev	5
I5	G2	dddc	c	sev	3
C3	G4	dddc	c	sev	5
F2	I2	dddc	c	sev	5
A5	G4	dddc	c	sev	4
D3	J2	dddc	c	sev	3
K5	E1	dddc	c	sev	3
B3	G2	dddc	c	sev	2
E4	D5	dddc	c	sev	3
K1	I3	dddc	c	sev	3
D1	I2	dddc	c	sev	2
H3	E1	dddc	c	sev	6
C4	B4	dddc	c	sev	4
E5	G1	dddc	c	sev	4
A1	K3	dddc	c	sev	7
H2	E3	dddc	c	sev	1
H5	J4	c	c	once	9
F4	J4	c	c	once	3
I1	K4	c	c	once	5
G5	J4	c	c	once	1
I4	C1	c	c	once	5
E2	C1	c	c	once	3
I5	L5	c	c	once	6
C3	L4	c	c	once	3
F2	L4	c	c	once	5
A5	H4	c	c	once	1
D3	C1	c	c	once	5
K5	H4	c	c	once	5
B3	L4	c	c	once	6
E4	L4	c	c	once	3
K1	J4	c	c	once	23
D1	J4	c	c	once	3
H3	J4	c	c	once	9
C4	H4	c	c	once	2
E5	H4	c	c	once	13
A1	J4	c	c	once	7
H2	C1	c	c	once	5
H5	G3	d	d	once	2
F4	L5	d	d	once	4
I1	A2	d	d	once	5
G5	L5	d	d	once	1
I4	A4	d	d	once	2
E2	A4	d	d	once	1
I5	D2	d	d	once	1
C3	D2	d	d	once	4
F2	G3	d	d	once	7
A5	B1	d	d	once	2
D3	A4	d	d	once	4
K5	B1	d	d	once	2
B3	L5	d	d	once	5
E4	D2	d	d	once	3
K1	D2	d	d	once	11
D1	L5	d	d	once	1
H3	L5	d	d	once	6
C4	A4	d	d	once	1
E5	B1	d	d	once	14
A1	L5	d	d	once	2
H2	B1	d	d	once	5

## Sheet: Test of memory capacity
focal	partner	treat	coop_level	time	total
M1	H4	c_1	coop	one	6
M3	L4	c_1	coop	one	6
M5	L4	c_1	coop	one	5
N2	J4	c_1	coop	one	4
N3	H4	c_1	coop	one	4
N4	L4	c_1	coop	one	5
N5	H4	c_1	coop	one	7
O3	C1	c_1	coop	one	6
O4	J4	c_1	coop	one	4
P5	J4	c_1	coop	one	4
Q3	C1	c_1	coop	one	3
R4	L4	c_1	coop	one	3
R5	J4	c_1	coop	one	8
S4	C1	c_1	coop	one	2
T2	C1	c_1	coop	one	6
T5	C1	c_1	coop	one	7
U1	J4	c_1	coop	one	8
U2	L4	c_1	coop	one	6
V1	J4	c_1	coop	one	9
V4	J4	c_1	coop	one	11
V5	J4	c_1	coop	one	8
W1	J4	c_1	coop	one	2
X1	C1	c_1	coop	one	10
X3	H4	c_1	coop	one	5
X5	J4	c_1	coop	one	4
M1	L4	c_3	coop	three	0
M3	H4	c_3	coop	three	5
M5	C1	c_3	coop	three	4
N2	H4	c_3	coop	three	7
N3	J4	c_3	coop	three	4
N4	J4	c_3	coop	three	7
N5	C1	c_3	coop	three	7
O3	J4	c_3	coop	three	9
O4	H4	c_3	coop	three	8
P5	L4	c_3	coop	three	2
Q3	J4	c_3	coop	three	9
R4	C1	c_3	coop	three	6
R5	H4	c_3	coop	three	10
S4	H4	c_3	coop	three	4
T2	H4	c_3	coop	three	2
T5	J4	c_3	coop	three	5
U1	C1	c_3	coop	three	3
U2	J4	c_3	coop	three	11
V1	L4	c_3	coop	three	4
V4	C1	c_3	coop	three	5
V5	C1	c_3	coop	three	5
W1	H4	c_3	coop	three	1
X1	L4	c_3	coop	three	8
X3	J4	c_3	coop	three	11
X5	C1	c_3	coop	three	13
M1	B1	d_1	def	one	3
M3	B1	d_1	def	one	2
M5	B1	d_1	def	one	3
N2	L5	d_1	def	one	3
N3	A2	d_1	def	one	1
N4	A2	d_1	def	one	4
N5	B1	d_1	def	one	3
O3	A4	d_1	def	one	3
O4	A2	d_1	def	one	2
P5	A4	d_1	def	one	1
Q3	B1	d_1	def	one	2
R4	L5	d_1	def	one	3
R5	B1	d_1	def	one	10
S4	L5	d_1	def	one	3
T2	A4	d_1	def	one	5
T5	A4	d_1	def	one	9
U1	B1	d_1	def	one	5
U2	B1	d_1	def	one	5
V1	L5	d_1	def	one	7
V4	B1	d_1	def	one	4
V5	A4	d_1	def	one	4
W1	A2	d_1	def	one	3
X1	A4	d_1	def	one	6
X3	A4	d_1	def	one	7
X5	A2	d_1	def	one	1
M1	A2	d_3	def	three	2
M3	A4	d_3	def	three	3
M5	A2	d_3	def	three	3
N2	A2	d_3	def	three	3
N3	L5	d_3	def	three	3
N4	B1	d_3	def	three	3
N5	L5	d_3	def	three	3
O3	L5	d_3	def	three	4
O4	B1	d_3	def	three	1
P5	B1	d_3	def	three	3
Q3	A2	d_3	def	three	5
R4	B1	d_3	def	three	3
R5	A2	d_3	def	three	11
S4	B1	d_3	def	three	2
T2	B1	d_3	def	three	1
T5	L5	d_3	def	three	7
U1	A4	d_3	def	three	4
U2	B1	d_3	def	three	2
V1	A2	d_3	def	three	5
V4	A2	d_3	def	three	2
V5	B1	d_3	def	three	0
W1	L5	d_3	def	three	1
X1	A2	d_3	def	three	12
X3	L5	d_3	def	three	4
X5	A4	d_3	def	three	3
